# Supplementary material for: Comparison of Lobectomy and Sublobar Resection for Stage IA Elderly NSCLC Patients (≥70 Years): A Population-Based Propensity Score Matching’s Study
Source: PubMed Central journal article supplement (PMC8139614; doi:10.3389/fonc.2021.610638), 2021-05-07

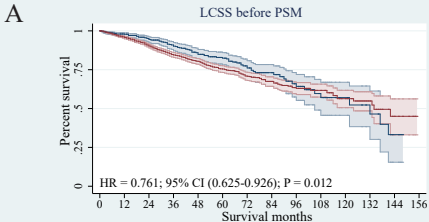

Number at risk

|                 |      |      |      |      |     |     |     |     |     |    |    |    |   |   |
|-----------------|------|------|------|------|-----|-----|-----|-----|-----|----|----|----|---|---|
| Segmentectomy   | 671  | 615  | 471  | 349  | 245 | 180 | 116 | 61  | 39  | 23 | 13 | 9  | 3 | 0 |
| Wedge resection | 2541 | 2302 | 1802 | 1341 | 972 | 625 | 368 | 192 | 128 | 88 | 45 | 22 | 8 | 0 |

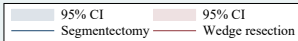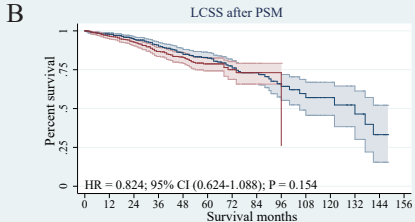

Number at risk

|                 |     |     |     |     |     |     |     |    |    |    |    |   |   |   |
|-----------------|-----|-----|-----|-----|-----|-----|-----|----|----|----|----|---|---|---|
| Segmentectomy   | 670 | 614 | 471 | 349 | 245 | 180 | 116 | 61 | 39 | 23 | 13 | 9 | 3 | 0 |
| Wedge resection | 670 | 616 | 488 | 345 | 233 | 123 | 45  | 3  | 1  | 0  | 0  | 0 | 0 | 0 |

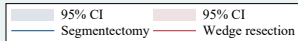

Supplement: Image_2.pdf [file Image_2.pdf]
