# Supplementary material for: Comparison of Lobectomy and Sublobar Resection for Stage IA Elderly NSCLC Patients (≥70 Years): A Population-Based Propensity Score Matching’s Study
Source: PubMed Central journal article supplement (PMC8139614; doi:10.3389/fonc.2021.610638), 2021-05-07

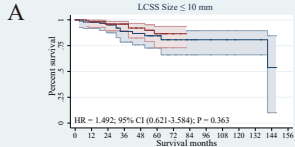

Number at risk

|                 |     |     |    |    |    |    |    |    |   |   |   |   |   |   |
|-----------------|-----|-----|----|----|----|----|----|----|---|---|---|---|---|---|
| Segmentectomy   | 95  | 89  | 67 | 53 | 40 | 28 | 16 | 10 | 7 | 6 | 4 | 4 | 1 | 0 |
| Wedge resection | 106 | 103 | 82 | 58 | 44 | 22 | 3  | 0  | 0 | 0 | 0 | 0 | 0 | 0 |

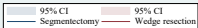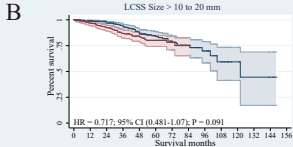

Number at risk

|                 |     |     |     |     |     |    |    |    |    |    |   |   |   |   |
|-----------------|-----|-----|-----|-----|-----|----|----|----|----|----|---|---|---|---|
| Segmentectomy   | 373 | 345 | 274 | 201 | 132 | 95 | 67 | 34 | 20 | 10 | 5 | 3 | 2 | 0 |
| Wedge resection | 360 | 332 | 266 | 194 | 136 | 69 | 28 | 1  | 0  | 0  | 0 | 0 | 0 | 0 |

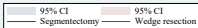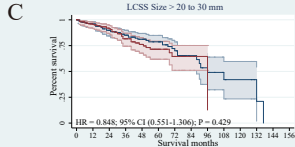

Number at risk

|                 |     |     |     |    |    |    |    |    |    |   |   |   |   |   |
|-----------------|-----|-----|-----|----|----|----|----|----|----|---|---|---|---|---|
| Segmentectomy   | 202 | 180 | 130 | 95 | 73 | 57 | 33 | 17 | 12 | 7 | 4 | 2 | 0 | 0 |
| Wedge resection | 204 | 181 | 140 | 93 | 53 | 32 | 14 | 2  | 1  | 0 | 0 | 0 | 0 | 0 |

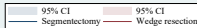

Supplement: Image_3.pdf [file Image_3.pdf]
