# Supplementary material for: Comparison of Lobectomy and Sublobar Resection for Stage IA Elderly NSCLC Patients (≥70 Years): A Population-Based Propensity Score Matching’s Study
Source: PubMed Central journal article supplement (PMC8139614; doi:10.3389/fonc.2021.610638), 2021-05-07

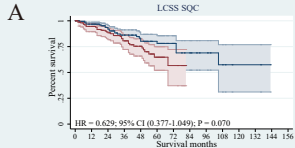

Number at risk

|                 |     |     |     |    |    |    |    |    |   |   |   |   |   |   |
|-----------------|-----|-----|-----|----|----|----|----|----|---|---|---|---|---|---|
| Segmentectomy   | 160 | 145 | 112 | 72 | 55 | 39 | 21 | 12 | 8 | 5 | 2 | 2 | 0 | 0 |
| Wedge resection | 157 | 135 | 105 | 73 | 46 | 18 | 6  | 0  | 0 | 0 | 0 | 0 | 0 | 0 |

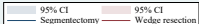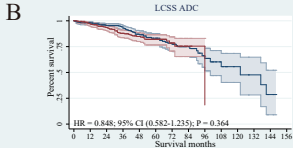

Number at risk

|                 |     |     |     |     |     |     |    |    |    |    |   |   |   |   |
|-----------------|-----|-----|-----|-----|-----|-----|----|----|----|----|---|---|---|---|
| Segmentectomy   | 381 | 350 | 282 | 222 | 150 | 113 | 76 | 42 | 25 | 13 | 7 | 5 | 2 | 0 |
| Wedge resection | 373 | 349 | 287 | 204 | 137 | 82  | 32 | 3  | 1  | 0  | 0 | 0 | 0 | 0 |

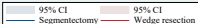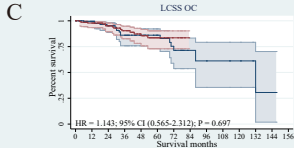

Number at risk

|                 |     |     |    |    |    |    |    |   |   |   |   |   |   |   |
|-----------------|-----|-----|----|----|----|----|----|---|---|---|---|---|---|---|
| Segmentectomy   | 129 | 119 | 77 | 55 | 40 | 28 | 19 | 7 | 6 | 5 | 4 | 2 | 1 | 0 |
| Wedge resection | 140 | 132 | 96 | 68 | 50 | 23 | 7  | 0 | 0 | 0 | 0 | 0 | 0 | 0 |

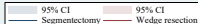

Supplement: Image_4.pdf [file Image_4.pdf]
