# Supplementary material for: Comparison of Lobectomy and Sublobar Resection for Stage IA Elderly NSCLC Patients (≥70 Years): A Population-Based Propensity Score Matching’s Study
Source: PubMed Central journal article supplement (PMC8139614; doi:10.3389/fonc.2021.610638), 2021-05-07

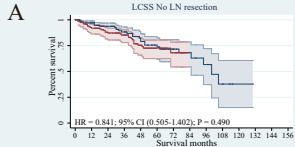

Number at risk

|                 |     |     |     |    |    |    |    |    |   |   |   |   |   |   |
|-----------------|-----|-----|-----|----|----|----|----|----|---|---|---|---|---|---|
| Segmentectomy   | 142 | 125 | 98  | 68 | 51 | 40 | 23 | 13 | 9 | 4 | 1 | 0 | 0 | 0 |
| Wedge resection | 154 | 133 | 108 | 84 | 54 | 29 | 13 | 0  | 0 | 0 | 0 | 0 | 0 | 0 |

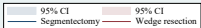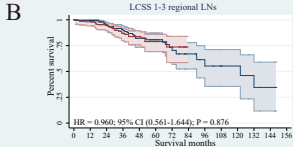

Number at risk

|                 |     |     |     |    |    |    |    |    |    |   |   |   |   |   |
|-----------------|-----|-----|-----|----|----|----|----|----|----|---|---|---|---|---|
| Segmentectomy   | 164 | 158 | 126 | 94 | 65 | 44 | 25 | 14 | 10 | 7 | 6 | 4 | 2 | 0 |
| Wedge resection | 157 | 148 | 127 | 89 | 59 | 30 | 10 | 0  | 0  | 0 | 0 | 0 | 0 | 0 |

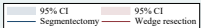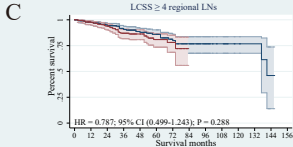

Number at risk

|                 |     |     |     |     |     |    |    |    |    |    |   |   |   |   |
|-----------------|-----|-----|-----|-----|-----|----|----|----|----|----|---|---|---|---|
| Segmentectomy   | 324 | 296 | 220 | 168 | 113 | 82 | 61 | 30 | 19 | 11 | 6 | 5 | 1 | 0 |
| Wedge resection | 290 | 271 | 204 | 135 | 95  | 50 | 17 | 0  | 0  | 0  | 0 | 0 | 0 | 0 |

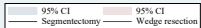

Supplement: Image_5.pdf [file Image_5.pdf]
