# Supplementary material for: Comparison of Lobectomy and Sublobar Resection for Stage IA Elderly NSCLC Patients (≥70 Years): A Population-Based Propensity Score Matching’s Study
Source: PubMed Central journal article supplement (PMC8139614; doi:10.3389/fonc.2021.610638), 2021-05-07
Supplement: Image_6.pdf [file Image_6.pdf]

# A

## Univariate COX Regression Analysis

| Variable                               | LCSS                     |         |
|----------------------------------------|--------------------------|---------|
|                                        | HR (95% CI)              | P       |
| Age (80+y vs $\geq 70$ to 79 y)        | <b>1.97 (1.48, 2.61)</b> | < 0.001 |
| Marital status                         |                          | 0.068   |
| Marital vs Single                      | <b>1.22 (0.67, 2.21)</b> | 0.512   |
| Other vs Single                        | <b>1.30 (0.71, 2.39)</b> | 0.394   |
| Gender(Male vs female)                 | <b>1.38 (1.05, 1.82)</b> | 0.022   |
| Race                                   |                          | 0.106   |
| White vs Black                         | <b>0.69 (0.42, 1.12)</b> | 0.129   |
| Other vs Black                         | <b>0.43 (0.19, 0.96)</b> | 0.038   |
| Grade                                  |                          | < 0.001 |
| Well/moderate vs Poor/Undifferentiated | <b>0.45 (0.34, 0.60)</b> | < 0.001 |
| Other vs Poor/Undifferentiated         | <b>0.42 (0.21, 0.84)</b> | 0.014   |
| Location                               |                          | 0.487   |
| Middle lobe vs Upper lobe              | <b>1.14 (0.58, 2.24)</b> | 0.712   |
| Lower lobe vs Upper lobe               | <b>0.86 (0.64, 1.14)</b> | 0.286   |
| Laterality(Right vs Left)              | <b>1.00 (0.76, 1.31)</b> | 0.976   |
| Histologic Type                        |                          | 0.015   |
| ADC vs SQC                             | <b>0.65 (0.48, 0.89)</b> | 0.008   |
| OC vs SQC                              | <b>0.61 (0.40, 0.94)</b> | 0.024   |
| Size                                   |                          | < 0.001 |
| > 1 to 2 cm vs $\leq 1$ cm             | <b>1.49 (0.92, 2.42)</b> | 0.104   |
| > 2 to 3 cm vs $\leq 1$ cm             | <b>2.44 (1.50, 3.98)</b> | < 0.001 |
| Surgery type(L vs Sub-L)               | <b>0.81 (0.61, 1.07)</b> | 0.140   |
| Scope Reg LN Sur                       |                          | 0.047   |
| 1-3 vs Non                             | <b>0.77 (0.54, 1.12)</b> | 0.175   |
| > 4 vs Non                             | <b>0.62 (0.44, 0.87)</b> | 0.006   |
| Other vs Non                           | <b>0.64 (0.36, 1.14)</b> | 0.131   |



# B

## Multivariate COX Regression Analysis

| Variable                                | LCSS                     |         |
|-----------------------------------------|--------------------------|---------|
|                                         | HR (95% CI)              | P       |
| Age ( $\geq 80+$ vs $\geq 70$ to 79y y) | <b>1.78 (1.34, 2.38)</b> | < 0.001 |
| Gender(Male vs Female)                  | <b>1.22 (0.93, 1.62)</b> | 0.157   |
| Grade                                   |                          | < 0.001 |
| Well/moderate vs Poor/Undifferentiated  | <b>0.51 (0.37, 0.69)</b> | < 0.001 |
| Other vs Poor/Undifferentiated          | <b>0.53 (0.26, 1.08)</b> | 0.080   |
| Histologic Type                         |                          | 0.175   |
| ADC vs SQC                              | <b>0.85 (0.61, 1.17)</b> | 0.306   |
| OC vs SQC                               | <b>0.66 (0.43, 1.02)</b> | 0.064   |
| Size                                    |                          | 0.003   |
| > 1 to 2 cm vs $\leq 1$ cm              | <b>1.30 (0.80, 2.11)</b> | 0.298   |
| > 2 to 3 cm vs $\leq 1$ cm              | <b>1.99 (1.21, 3.28)</b> | 0.007   |
| Scope Reg LN Sur                        |                          | 0.130   |
| 1-3 vs Non                              | <b>0.81 (0.56, 1.17)</b> | 0.264   |
| >4 vs Non                               | <b>0.67 (0.47, 0.94)</b> | 0.022   |
| Other vs Non                            | <b>0.68 (0.38, 1.21)</b> | 0.190   |
